# Supplementary material for: Assessing the Safety of Sitagliptin in Older Participants in the Trial Evaluating Cardiovascular Outcomes with Sitagliptin (TECOS)
Source: Oxford University Press journal article supplement (doi:10.2337/dc16-1135), 2017-01-05
Supplement: dc161135supplementarydata.pdf [file dc161135supplementarydata.pdf]

## SUPPLEMENTARY DATA

### Supplementary Appendices

**Appendix A. Clinical Events List.** Events from this list were collected systematically at each visit and have been tabulated for analysis. These prespecified events were not reported as adverse events.

#### I. Primary or Secondary Study Endpoints

- A. **Obvious study endpoints** (These events will prompt the investigator to complete an endpoint package which will then be adjudicated according to the Clinical Events Classification [CEC] charter)
- Death
    - Cardiovascular (CV) death (i.e., fatal myocardial infarction [MI]/cerebrovascular accident [CVA]/ congestive heart failure [CHF]/arrhythmia, cardiac arrest, death following CV intervention)
    - Non-CV death
  - Nonfatal MI
  - Unstable angina
  - Nonfatal CVA
  - CHF requiring hospitalization
- B. **Cardiovascular Events of Interest** (some of these events will result in prompts to answer additional questions in the eCRF – these questions will be designed to determine whether or not a primary or secondary outcome of interest has occurred)
- Atrial fibrillation/atrial flutter
  - Ventricular fibrillation/tachycardia requiring intervention
  - Deep vein thrombosis (DVT)
  - Pulmonary embolism
  - Percutaneous Coronary Intervention (PCI)
  - Coronary artery bypass graft (CABG)
  - Coronary catheterization
  - Stress test
  - Abdominal aortic aneurysm/repair
  - Carotid endarterectomy/carotid angioplasty and/or stenting
  - Any hospitalization due to cardiovascular events (i.e., whether or not the hospitalization was for an obvious study endpoint)
  - Shock/hypotension
  - Accelerated or malignant hypertension/hypertensive urgency
  - Transient ischemic attack (TIA)
  - Syncope
  - Renal artery angioplasty and/or stenting
  - Other arterial angioplasty and/or stenting

#### II. Expected Events and Diabetic Complications (subcategories indicate potential additional information to be captured, usually as an indication of severity)

- A. Peripheral vascular disease (PVD)
- Limb PCI
  - Vascular surgery
  - Amputation
  - Surgical debridement of ulcer

## SUPPLEMENTARY DATA

- B. Gangrene
- C. Hypoglycemia/hyperglycemia /diabetic ketoacidosis /hyperosmolar hyperglycemic nonketotic coma
- D. Diabetic eye disease
  - Photocoagulation or other laser therapy
  - Cataract extraction
  - Blindness
  - Enucleation
  - Steroid/bevacizumab injection
  - Scleral buckling or other retinal fixation procedure
- E. Diabetic neuropathy (including distal sensorimotor, focal/multifocal, or autonomic)
  - Foot ulcer
- F. Diabetic nephropathy
  - Microalbuminuria
  - Proteinuria
- G. Renal failure/peritoneal or hemodialysis/renal transplant (including creation of fistula or other vascular access for hemodialysis)
- H. Any hospitalization due to complications of DM
- I. Infections
  - Osteomyelitis
    - IV antibiotic therapy vs. debridement
  - Cellulitis
    - Oral vs. IV antibiotic therapy
  - Mucormycosis
  - Pneumonia
    - Community acquired vs. hospital acquired
    - Oral vs. IV antibiotic therapy
  - Bacteremia
  - Sepsis
  - Infected joints
    - Prosthetic joint
  - Complicated or serious urinary tract infection (UTI)/pyelonephritis
    - Requiring hospitalization
  - Malignant external otitis
- J. Gastrointestinal (GI) conditions
  - Abdominal pain
  - Nausea/vomiting
  - Diarrhea
  - Fatty liver disease/Nonalcoholic steatohepatitis (NASH)
  - Pancreatitis
  - Cholecystitis/cholelithiasis
- K. Metabolic conditions associated with diabetes
  - Hyperlipidemia/dyslipidemia
  - Hypertension
  - Gout

## SUPPLEMENTARY DATA

### III. Terms Listed in the Sitagliptin Product Circular

#### A. Allergic reactions

- Hypersensitivity reactions
- Anaphylaxis
- Angioedema
- Urticaria
- Exfoliative skin reaction
- Stevens-Johnson syndrome
- Rash

#### B. For all other terms please refer to the current local product circular

SUPPLEMENTARY DATA

**Supplementary Table S1. Characteristics of patient follow-up**

|                                           | All participants           |                             | ≥75 years old          |                     |
|-------------------------------------------|----------------------------|-----------------------------|------------------------|---------------------|
|                                           | ≥ 75 years old<br>(n=2004) | <75 years old<br>(n=12,347) | Sitagliptin<br>(n=970) | Placebo<br>(n=1034) |
| Median (IQR) duration of follow-up, years | 2.9 (2.2, 3.6)             | 3.0 (2.3, 3.8)              | 2.8 (2.2, 3.6)         | 2.9 (2.2, 3.6)      |
| Completed study, n (%)                    | 1,856 (92.6)               | 11,717 (94.9)               | 908 (93.6)             | 948 (91.7)          |
| Lost to follow-up, n (%)                  | 21 (1.0)                   | 111 (0.9)                   | 8 (0.8)                | 13 (1.3)            |
| Withdrawn consent, n (%)                  | 127 (6.3)                  | 519 (4.2)                   | 54 (5.6)               | 73 (7.1)            |
| Median (IQR) study drug exposure, years   | 2.4 (1.7, 3.2)             | 2.7 (2.0, 3.5)              | 2.3 (1.7, 3.2)         | 2.4 (1.7, 3.3)      |
| Study drug discontinuation                | 734 (36.6%)                | 2,975 (24.1%)               | 357 (37.3%)            | 377 (36.8%)         |

SUPPLEMENTARY DATA

**Supplementary Table S2. Baseline characteristics for the intention to treat population**

| Characteristic                            | All participants          |                             | ≥75 years old          |                     |
|-------------------------------------------|---------------------------|-----------------------------|------------------------|---------------------|
|                                           | ≥75 years old<br>(n=2004) | <75 years old<br>(n=12,347) | Sitagliptin<br>(n=970) | Placebo<br>(n=1034) |
| Male gender                               | 1356 (67.7%)              | 8847 (71.7%)                | 682 (70.3%)            | 674 (65.2%)         |
| Age, years                                | 78.3 ± 3.1                | 63.4 ± 6.4                  | 78.3 ± 3.0             | 78.4 ± 3.2          |
| Race*                                     |                           |                             |                        |                     |
| White                                     | 1530 (76.3%)              | 8107 (65.7%)                | 755 (78%)              | 775 (75%)           |
| Black                                     | 37 (1.8%)                 | 410 (3.3%)                  | 12 (1%)                | 25 (2%)             |
| Asian                                     | 270 (13.5%)               | 2995 (24.3%)                | 131 (14%)              | 139 (13%)           |
| Other                                     | 167 (8.3%)                | 835 (6.8%)                  | 72 (7%)                | 95 (9%)             |
| BMI, kg/m <sup>2</sup> *                  | 28.9 ± 4.8                | 30.3 ± 5.7                  | 29.0 ± 4.9             | 28.9 ± 4.8          |
| SBP, mmHg*                                | 137 ± 18                  | 134 ± 17                    | 137 ± 18               | 137 ± 18            |
| DBP, mmHg*                                | 74 ± 11                   | 78 ± 10                     | 74 ± 11                | 74 ± 11             |
| HbA1c, %*                                 | 7.18 ± 0.46               | 7.24 ± 0.48                 | 7.19 ± 0.46            | 7.17 ± 0.46         |
| <7.0%                                     | 754 (37.7%)               | 4102 (33.2%)                | 354 (36.5%)            | 400 (38.7%)         |
| <7.5%                                     | 1395 (69.7%)              | 7873 (63.8%)                | 671 (69.2%)            | 724 (70.1%)         |
| HbA1c, mmol/mol*                          | 55.0 ± 5.1                | 55.7 ± 5.2                  | 55.1 ± 5.1             | 54.8 ± 5.0          |
| <53 mmol/mol                              | 749 (37.4%)               | 4081 (33.1%)                | 352 (36.3%)            | 397 (38.4%)         |
| <58 mmol/mol                              | 1387 (69.3%)              | 7835 (63.5%)                | 669 (69.0%)            | 718 (69.5%)         |
| eGFR, mL/min/1.73 m <sup>2</sup> *        | 65.5 ± 19.2               | 76.3 ± 21.0                 | 65.3 ± 19.0            | 65.7 ± 19.3         |
| ≥90                                       | 205/1983<br>(10.3%)       | 3026/12,226<br>(24.8%)      | 95/960 (9.9%)          | 110/1023 (10.8%)    |
| 60-89                                     | 963/1983<br>(48.6%)       | 6761/12,226<br>(55.3%)      | 474/960 (49.4%)        | 489/1023 (47.8%)    |
| 30-59                                     | 814/1983<br>(41.0%)       | 2437/12,226<br>(19.9%)      | 390/960 (40.6%)        | 424/1023 (41.4%)    |
| <30                                       | 1/1983 (0.1%)             | 2/12,226<br>(<0.1%)         | 1/960 (<1.0%)          | 0                   |
| Total cholesterol, mmol/L*                | 4.1 ± 1.0                 | 4.3 ± 1.2                   | 4.1 ± 1.0              | 4.1 ± 1.1           |
| LDL, mmol/L*                              | 2.3 ± 2.6                 | 2.4 ± 1.2                   | 2.4 ± 3.7              | 2.2 ± 0.9           |
| HDL, mmol/L*                              | 1.2 ± 0.3                 | 1.1 ± 0.3                   | 1.2 ± 0.3              | 1.2 ± 0.3           |
| Triglycerides, mmol/L*                    | 1.6 ± 0.9                 | 1.9 ± 1.1                   | 1.7 ± 1.0              | 1.6 ± 0.8           |
| Median duration of diabetes, years (IQR)* | 12 (7, 21)                | 9 (5, 15)                   | 13 (7, 21)             | 12 (7, 21)          |
| Prior cardiovascular disease              |                           |                             |                        |                     |
| ≥50% stenosis in a coronary artery        | 1036 (51.7%)              | 6470 (52.4%)                | 493 (50.8%)            | 543 (52.5%)         |
| Myocardial infarction                     | 823 (41.1%)               | 5275 (42.7%)                | 402 (41.4%)            | 421 (40.7%)         |
| Prior PCI                                 | 743/1969<br>(37.7%)       | 4852/12,184<br>(39.8%)      | 355/956 (37.1%)        | 388/1013 (38.3%)    |
| CABG*                                     | 579 (28.9%)               | 3012 (24.4%)                | 298 (30.7%)            | 281 (27.2%)         |
| Stroke                                    | 376 (18.8%)               | 2092 (16.9%)                | 172 (17.7%)            | 204 (19.7%)         |
| TIA*                                      | 119 (5.9%)                | 430 (3.5%)                  | 64 (6.6%)              | 55 (5.3%)           |
| ≥50% stenosis in a carotid artery*        | 180 (9.0%)                | 665 (5.4%)                  | 84 (8.7%)              | 96 (9.3%)           |
| Peripheral arterial disease               | 352 (17.6%)               | 2040 (16.5%)                | 178 (18.4%)            | 174 (16.8%)         |
| Prior congestive heart failure*           | 422 (21.1%)               | 1970 (16.0%)                | 190 (19.6%)            | 232 (22.4%)         |
| Atrial fibrillation*                      | 291 (14.5%)               | 839 (6.8%)                  | 138 (14.2%)            | 153 (14.8%)         |
| Alcohol abuse                             | 135 (6.7%)                | 1,030 (8.3%)                | 11 (1.1%)              | 12 (1.2%)           |
| Depression                                | 135 (6.7%)                | 1,030 (8.3%)                | 55 (5.7%)              | 80 (7.7%)           |
| Cigarette smoking status*                 |                           |                             |                        |                     |

SUPPLEMENTARY DATA

| Characteristic                    | All participants          |                             | ≥75 years old          |                     |
|-----------------------------------|---------------------------|-----------------------------|------------------------|---------------------|
|                                   | ≥75 years old<br>(n=2004) | <75 years old<br>(n=12,347) | Sitagliptin<br>(n=970) | Placebo<br>(n=1034) |
| Currently smoking                 | 90 (4.5%)                 | 1,561 (12.6%)               | 42 (4.3%)              | 48 (4.6%)           |
| Prior smoker                      | 831 (41.5%)               | 4,914 (39.8%)               | 401 (41.3%)            | 430 (41.6%)         |
| Never smoked                      | 1,083 (54.0%)             | 5,872 (47.6%)               | 527 (54.3%)            | 556 (53.8%)         |
| Chronic liver disease             | 21 (1.1%)                 | 249 (2.0%)                  | 11 (1.1%)              | 10 (1.0%)           |
| Medication use                    |                           |                             |                        |                     |
| <i>Antidiabetic</i>               |                           |                             |                        |                     |
| Metformin*                        | 1449 (72.3%)              | 10,265 (83.1%)              | 711 (73.3%)            | 738 (71.4%)         |
| Sulfonylurea                      | 946 (47.2%)               | 5,569 (45.1%)               | 442 (45.6%)            | 504 (48.7%)         |
| Thiazolidinedione                 | 57 (2.8%)                 | 319 (2.6%)                  | 24 (2.5%)              | 33 (3.2%)           |
| Insulin                           | 501 (25.0%)               | 2844 (23.0%)                | 255/717<br>(35.6%)     | 246/728 (33.8%)     |
| Median daily dose, units<br>(IQR) | 51.0 (34.0, 80.0)         | 44.0 (28.0, 67.5)           | 44.0 (28.0, 72.0)      | 42.0 (28.5, 64.0)   |
| Monotherapy*                      | 1066 (53.2%)              | 5755 (46.6%)                | 514 (53.0%)            | 552 (53.4%)         |
| Dual combination therapy*         | 913 (45.6%)               | 6477 (52.5%)                | 446 (46.0%)            | 467 (45.2%)         |
| <i>Antihypertensive</i>           |                           |                             |                        |                     |
| Beta blocker                      | 1207 (60.2%)              | 7865 (63.7%)                | 585 (60.3%)            | 622 (60.2%)         |
| ACE Inhibitor                     | 1018 (50.8%)              | 6634 (53.7%)                | 506 (52.2%)            | 512 (49.5%)         |
| Angiotensin receptor blocker      | 615 (30.7%)               | 3479 (28.2%)                | 293 (30.2%)            | 322 (31.1%)         |
| Calcium channel blocker*          | 818 (40.8%)               | 4036 (32.7%)                | 395 (40.7%)            | 423 (40.9%)         |
| Diuretic*                         | 967 (48.3%)               | 4912 (39.8%)                | 453 (46.7%)            | 514 (49.7%)         |
| <i>Antiplatelet</i>               |                           |                             |                        |                     |
| Aspirin*                          | 1473 (73.5%)              | 9829 (79.6%)                | 702 (72.4%)            | 771 (74.6%)         |
| Clopidogrel/Ticlopidine           | 383 (19.1%)               | 2745 (22.2%)                | 195 (20.1%)            | 188 (18.2%)         |
| Vitamin K antagonist*             | 255 (12.7%)               | 717 (5.8%)                  | 134 (13.8%)            | 121 (11.7%)         |
| Any antiplatelet*                 | 1591 (79.4%)              | 10,443 (84.6%)              | 771 (79.5%)            | 820 (79.3%)         |
| <i>Lipid Lowering</i>             |                           |                             |                        |                     |
| Statin                            | 1582 (78.9%)              | 9998 (81.0%)                | 761 (78.5%)            | 821 (79.4%)         |
| Fibrate                           | 99 (4.9%)                 | 840 (6.8%)                  | 54 (5.6%)              | 45 (4.4%)           |
| Niacin                            | 50 (2.5%)                 | 237 (1.9%)                  | 27 (2.8%)              | 23 (2.2%)           |
| Ezetimibe                         | 94 (4.7%)                 | 667 (5.4%)                  | 45 (4.6%)              | 49 (4.7%)           |
| Any lipid lowering                | 1641 (81.9%)              | 10,340 (83.7%)              | 797 (82.2%)            | 844 (81.6%)         |

Data are n (%) or mean ± SD, except where indicated. Denominators are indicated where they differ from that provided in the column header. Characteristics with p-values <0.0001 comparing older to younger cohorts are indicated by \*. P values comparing sitagliptin and placebo groups were not calculated.

SUPPLEMENTARY DATA

**Supplementary Table S3. Treatment-emergent serious adverse events according to system organ class (SOC) in the older and younger cohorts**

| <b>System Organ Class Preferred Term<br/>Subjects with one or more:</b> | <b>Age ≥ 75 years old<br/>(N=1979)</b> | <b>Age &lt; 75 years old<br/>(N=12,246)</b> | <b>Difference in proportion<br/>with an event<br/>(95% CI)</b> |
|-------------------------------------------------------------------------|----------------------------------------|---------------------------------------------|----------------------------------------------------------------|
| Neoplasms benign, malignant and unspecified (inclu. cysts and polyps)   | 174 (8.8%)                             | 527 (4.3%)                                  | 4.49 (3.26, 5.86)                                              |
| Basal cell carcinoma                                                    | 35 (1.8%)                              | 61 (0.5%)                                   | 1.27 (0.76, 1.96)                                              |
| Squamous cell carcinoma                                                 | 22 (1.1%)                              | 42 (0.3%)                                   | 0.77 (0.37, 1.34)                                              |
| Squamous cell carcinoma of skin                                         | 17 (0.9%)                              | 15 (0.1%)                                   | 0.74 (0.41, 1.25)                                              |
| Colon cancer                                                            | 7 (0.4%)                               | 17 (0.1%)                                   | 0.21 (0.02, 0.59)                                              |
| Malignant melanoma                                                      | 5 (0.3%)                               | 11 (0.1%)                                   | 0.16 (0.00, 0.50)                                              |
| Lung adenocarcinoma                                                     | 5 (0.3%)                               | 5 (0.0%)                                    | 0.21 (0.06, 0.55)                                              |
| Plasma cell myeloma                                                     | 3 (0.2%)                               | 4 (0.0%)                                    | 0.12 (0.01, 0.41)                                              |
| Injury, poisoning and procedural complications                          | 63 (3.2%)                              | 212 (1.7%)                                  | 1.45 (0.72, 2.35)                                              |
| Fall                                                                    | 7 (0.4%)                               | 11 (0.1%)                                   | 0.26 (0.07, 0.64)                                              |
| Femur fracture                                                          | 7 (0.4%)                               | 10 (0.1%)                                   | 0.27 (0.08, 0.65)                                              |
| Hip fracture                                                            | 4 (0.2%)                               | 7 (0.1%)                                    | 0.14 (0.01, 0.46)                                              |
| Spinal compression fracture                                             | 4 (0.2%)                               | 5 (0.0%)                                    | 0.16 (0.03, 0.48)                                              |
| Head injury                                                             | 3 (0.2%)                               | 4 (0.0%)                                    | 0.12 (0.01, 0.41)                                              |
| Gastrointestinal disorders                                              | 46 (2.3%)                              | 183 (1.5%)                                  | 0.83 (0.21, 1.62)                                              |
| Gastroesophageal reflux disease                                         | 4 (0.2%)                               | 5 (0.0%)                                    | 0.16 (0.03, 0.48)                                              |
| Musculoskeletal and connective tissue disorders                         | 29 (1.5%)                              | 179 (1.5%)                                  | 0.00 (-0.50, 0.66)                                             |
| Lumbar spinal stenosis                                                  | 6 (0.3%)                               | 12 (0.1%)                                   | 0.21 (0.03, 0.56)                                              |
| Respiratory, thoracic and mediastinal disorders                         | 27 (1.4%)                              | 116 (0.9%)                                  | 0.42 (-0.05, 1.05)                                             |
| Pneumothorax                                                            | 3 (0.2%)                               | 4 (0.0%)                                    | 0.12 (0.01, 0.41)                                              |
| Renal and urinary disorders                                             | 15 (0.8%)                              | 68 (0.6%)                                   | 0.20 (-0.13, 0.70)                                             |

SUPPLEMENTARY DATA

| <b>System Organ Class Preferred Term<br/>Subjects with one or more:</b> | <b>Age ≥ 75 years old<br/>(N=1979)</b> | <b>Age &lt; 75 years old<br/>(N=12,246)</b> | <b>Difference in proportion<br/>with an event<br/>(95% CI)</b> |
|-------------------------------------------------------------------------|----------------------------------------|---------------------------------------------|----------------------------------------------------------------|
| Urinary retention                                                       | 5 (0.3%)                               | 5 (0.0%)                                    | 0.21 (0.06, 0.55)                                              |
| Metabolism and nutrition disorders                                      | 14 (0.7%)                              | 51 (0.4%)                                   | 0.29 (-0.02, 0.78)                                             |
| Hyponatraemia                                                           | 8 (0.4%)                               | 21 (0.2%)                                   | 0.23 (0.01, 0.63)                                              |
| Dehydration                                                             | 5 (0.3%)                               | 8 (0.1%)                                    | 0.19 (0.03, 0.53)                                              |

Analysis cohort is all patients as treated. This table includes 1) SOCs exceeding 1% or where the 95% CI excludes 0; 2) within the SOCs that exceed 1%, any preferred term that exceeds 1%; and 3) any individual preferred term where the 95% CI excludes 0.
